# Supplementary material
Source: publisher site journal article supplement (https://www.dovepress.com/article/317500)
Supplement: Supplementary file 1 [file get_supplementary_file.php]

**Supplementary material**

**Referral for “neoadjuvant chemotherapy” for muscle-invasive bladder cancer to a multidisciplinary board: Patterns, Management and Outcomes**

Athanasios Dellis MD1, Roubini Zakopoulou MD2, Andromahi Kougioumtzopoulou MD3, Kimon Tzannis Msc2, Konstantinos Koutsoukos MD2, Charalampos Fragkoulis MD4, Efthymios Kostouros MD5, Athanasios Papatsoris MD6, Ioannis Varkarakis MD6, Konstantinos Stravodimos MD7, Eleni Boutati MD8, Stamata Pagoni MD5, Miltiades Seferlis MD9, Michael Chrisofos MD10, Vasilios Kouloulias MD3, Konstantinos Doumas MD4, Charalampos Deliveliotis MD6, Constantinos Constantinides MD7, Meletios A. Dimopoulos MD2, Aristotelis Bamias MD8.

1 2nd Department of Surgery, National & Kapodistrian University of Athens, Aretaieion University Hospital, Athens, Greece; 2 Oncology Unit, Department of Clinical Therapeutics, National & Kapodistrian University of Athens, Alexandra Hospital, Athens, Greece, 3 Radiotherapy Unit, 2nd Department of Radiology, National & Kapodistrian University of Athens, Attikon University Hospital, Athens, Greece; 4 Department of Urology, General Hospital of Athens "G. Gennimatas", Athens, Greece, 5 3rd Department of Internal Medicine, General Hospital of Athens "G. Gennimatas", Athens, Greece; 6 2nd Department of Urology, National & Kapodistrian University of Athens, Sismanoglio Hospital, Athens, Greece; 7 First Department of Urology, National and Kapodistrian University of Athens, "Laiko" General Hospital, Athens, Greece; 8 2nd Propaedeutic Department of Internal Medicine, National & Kapodistrian University of Athens, Attikon University Hospital, Athens, Greece; 9 Department of Urology, Thriasion General Hospital, Athens, Greece; 10 3rd Department of Urology, National & Kapodistrian University of Athens, Attikon University Hospital, Athens, Greece.

**Table S1**. Correlation of clinical and pathological stage in 30 patients undergoing radical cystectomy

| *Staging* | | PATHOLOGICAL (yp) | | | | | | | | | |
| --- | --- | --- | --- | --- | --- | --- | --- | --- | --- | --- | --- |
| T0 | Ta | Tis | T1 | T2 | T3 | T4a | N0 | N+ | Nx | |
| CLINICAL | T1 |  |  | 1 |  |  |  |  | 1 |  |  | |
| T2 | 4 | 1 | 1 | 2 | 3 | 8 | 3 | 16 | 3 | 3 | |
| T3 | 1 | 1 |  |  | 3 | 1 |  | 3 | 2 | 1 | |
| T4a |  |  | 1 |  |  |  |  |  |  | 1 | |
| Ν0 | 5 | 2 | 1 | 2 | 5 | 6 | 2 | 17 | 2 | 4 | |
| N2 |  |  |  |  |  | 1 | 1 | 1 | 1 |  | |
| N3 |  |  |  |  |  | 1 |  |  | 1 |  | |
| M1a |  |  | 1 |  | 1 |  |  | 1 | 1 |  | |
| Un* |  |  | 1 |  |  | 1 |  | 1 |  | 1 | |
| II | 4 |  | 1 | 2 | 3 | 6 | 2 | 14 | 2 | 2 | |
| IIIA | 1 | 2 |  |  | 2 |  |  | 3 |  | 2 | |
| IIIB |  |  |  |  |  | 2 | 1 | 1 | 2 |  | |
| IVA |  |  | 1 |  | 1 |  |  | 1 | 1 |  | |
| Un* |  |  | 1 |  |  | 1 |  | 1 |  | 1 | |

*: unknown lymph node clinical status


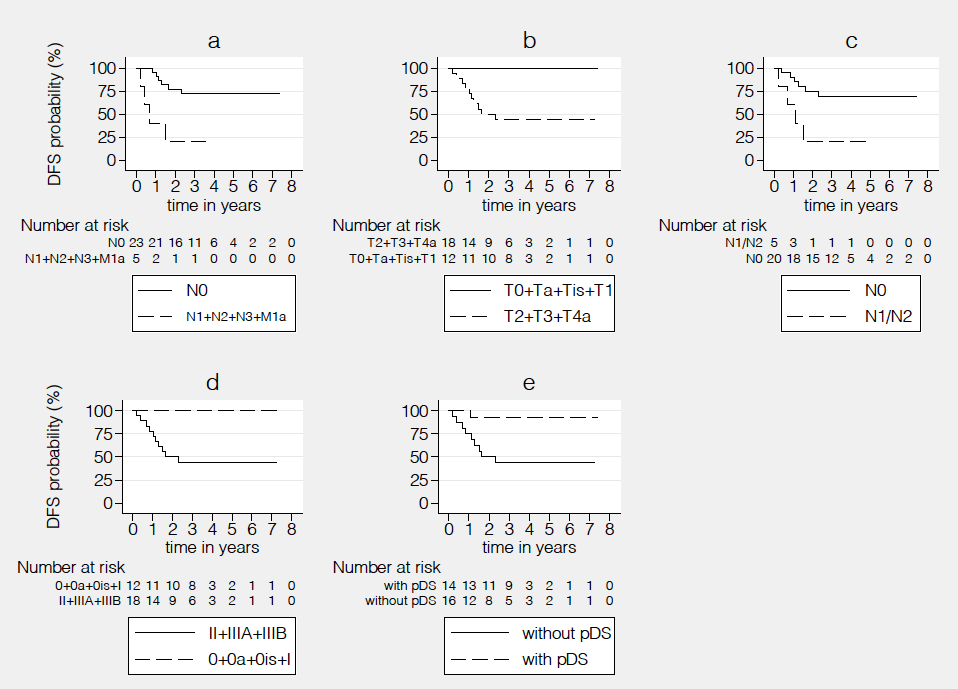
 Figure S1

Disease-free survival according to: clinical N stage (a), pathological T stage (b), pathological N stage (c), pathological TNM stage (d) and pathological downstaging (e) of 30 patients who underwent radical cystectomy after neoadjuvant chemotherapy.
